# Supplementary material for: Advanced Glycation End Products Induce Vascular Smooth Muscle Cell-Derived Foam Cell Formation and Transdifferentiate to a Macrophage-Like State
Source: Hindawi journal article supplement (doi:10.1155/2020/6850187), 2020-08-07

**Supplemental Table 1. RT-PCR primers of VSMC related gene and Macrophage related gene**

| Gene   | Directin | Primer Sequence         |
|--------|----------|-------------------------|
| Cnn1   | For      | GGACCAGGCGACCATCAG      |
|        | Rev      | TAGGCAGAGTTGTAGTAGTTGTG |
| Acta2  | For      | GCTTCGCTGGTGATGATGCTC   |
|        | Rev      | AGTTGGTGATGATGCCGTGTTTC |
| Myocd  | For      | AAGGTCCATTCCAACGCTC     |
|        | Rev      | CCATCTCTACTGCTGTCATCC   |
| Gapdh  | For      | CGTGCCGCCTGGAGAAAC      |
|        | Rev      | TGGGAGTTGCTGTTGAAGTCG   |
| CD68   | For      | CTTCCCACAGGCAGCACAG     |
|        | Rev      | ATGATGAGAGGCAGCAAGAGG   |
| Lgals3 | For      | AGGAGAGGGAATGATGTTGCC   |
|        | Rev      | GGTTTGCCACTCTCAAAGGG    |

**Supplemental Table 2. Subject characteristics, primary diagnosis and percent SMC foam cells**

| Subject no. | Age(years) | Sex | Primary diagnosis                                                              | Percent of SMC foam cells |
|-------------|------------|-----|--------------------------------------------------------------------------------|---------------------------|
| 1           | 61         | F   | diabetic foot, type 2 diabetes                                                 | 72.3                      |
| 2           | 67         | F   | Right lower limb amputation wound ulcer, type 2 diabetes                       | 37.4                      |
| 3           | 75         | M   | Left lower limb erysipelas, diabetic foot, type 2 diabetes                     | 26.3                      |
| 4           | 81         | M   | diabetic foot, type 2 diabetic                                                 | 21.6                      |
| 5           | 67         | F   | Left diabetic foot, type 2 diabetes                                            | 52.7                      |
| 6           | 62         | M   | Left diabetic foot, type 2 diabetes                                            | 18.4                      |
| 7           | 70         | F   | Right diabetic foot, type 2 diabetes                                           | 53.2                      |
| 8           | 79         | M   | Right diabetic foot, type 2 diabetes                                           | 35.7                      |
| 9           | 74         | M   | Left foot ulcer, diabetic foot disease, radioactive dermatitis type 2 diabetes | 28.6                      |
| 10          | 62         | F   | Right diabetic foot, type 2 diabetes                                           | 30.1                      |
| 11          | 71         | M   | Right diabetic foot, type 2 diabetes                                           | 63.1                      |
| 12          | 69         | F   | Left diabetic foot, type 2 diabetes                                            | 32.5                      |
| 13          | 74         | M   | Right diabetic foot, type 2 diabetes                                           | 47.8                      |
| 14          | 68         | M   | Left diabetic foot, type 2 diabetes                                            | 56.3                      |
| 15          | 72         | F   | Right diabetic foot, type 2 diabetes                                           | 36.2                      |
| 16          | 58         | M   | Right diabetic foot, type 2 diabetes                                           | 32.5                      |

**Supplemental Figure 1. Gal-3 siRNA did not change the degree of CML induced lipid accumulation in VSMC**

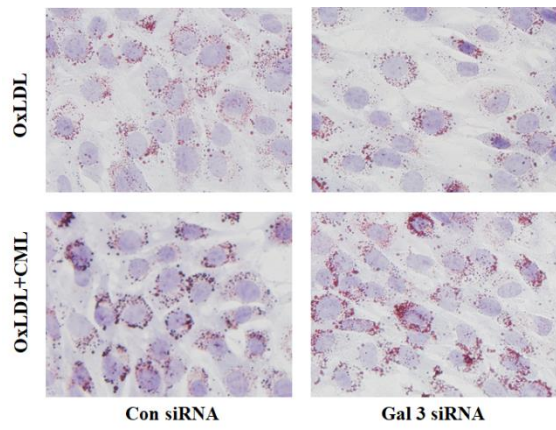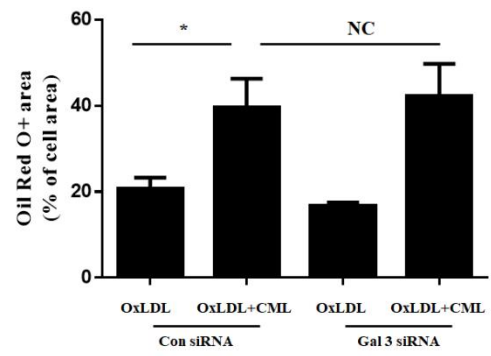

Supplement: f1 [file 6850187.f1.pdf]
